# Supplementary material for: A Phase I Study of MLN4924 and Belinostat in Relapsed/Refractory Acute Myeloid Leukemia or Myelodysplastic Syndrome
Source: Research Square preprint supplement (doi:10.21203/rs.3.rs-4889008/v1), 2024-10-14
Supplement: Supplementary file 1 [file 4f83036d8a3b5d1b3c029e0e.pdf]

| <b>Table 1:Dose Escalation Schedule</b> |                                    |                                                                           |                                    |                                                                                   |
|-----------------------------------------|------------------------------------|---------------------------------------------------------------------------|------------------------------------|-----------------------------------------------------------------------------------|
| <b>Dose Level</b>                       | <b>Belinostat</b>                  |                                                                           | <b>MLN4924 (pevonedistat)</b>      |                                                                                   |
|                                         | <b>Dose (mg/m<sup>2</sup>/day)</b> | <b>Administration and Schedule</b>                                        | <b>Dose (mg/m<sup>2</sup>/day)</b> | <b>Administration and Schedule</b>                                                |
| -1                                      | 800                                | Intravenously over 30 minutes once daily on Days 1-5 of each 21-day cycle | 15                                 | Intravenously over 60 minutes once daily on Days 1, 3, & 5 of each 21-day cycle** |
| 1*                                      | 800                                |                                                                           | 20                                 |                                                                                   |
| 2                                       | 800                                |                                                                           | 25                                 |                                                                                   |
| 3                                       | 800                                |                                                                           | 37                                 |                                                                                   |
| 4                                       | 1000                               |                                                                           | 37                                 |                                                                                   |
| 5                                       | 1000                               |                                                                           | 50                                 |                                                                                   |

\* Starting dose level

\*\* When both drugs are given on the same day (Days 1, 3, 5), start the MLN4924 (pevonedistat) infusion within 60 mins after the completion of belinostat infusion.
