# Supplementary material for: A Phase I Study of MLN4924 and Belinostat in Relapsed/Refractory Acute Myeloid Leukemia or Myelodysplastic Syndrome
Source: Research Square preprint supplement (doi:10.21203/rs.3.rs-4889008/v1), 2024-10-14
Supplement: Supplementary file 2 [file 83f4d406b7e9ef35c00ce9b0.pdf]

**Table 3: Number of Patients with High Grade ( $\geq 3$ ) related adverse events**

| <b>Toxicity*</b>                                                                                              | <b>Grade3<br/>n (%)</b> | <b>Grade4<br/>n (%)</b> | <b>Total<br/>n (%)</b> |
|---------------------------------------------------------------------------------------------------------------|-------------------------|-------------------------|------------------------|
| Anemia                                                                                                        | 3 (16.7)                | 0 (0.0)                 | 3 (16.7)               |
| Febrile neutropenia                                                                                           | 1 (5.6)                 | 0 (0.0)                 | 1 (5.6)                |
| Fatigue                                                                                                       | 1 (5.6)                 | 0 (0.0)                 | 1 (5.6)                |
| Neutrophil count decreased                                                                                    | 1 (5.6)                 | 2 (11.1)                | 3 (16.7)               |
| Platelet count decreased                                                                                      | 1 (5.6)                 | 4 (22.2)                | 5 (27.8)               |
| White blood cell decreased                                                                                    | 3 (16.7)                | 1 (5.6)                 | 4 (22.2)               |
| *When a particular patient had the same toxicity on more than one occasion, only the highest grade is listed. |                         |                         |                        |
