# Supplementary material for: A Phase I Study of MLN4924 and Belinostat in Relapsed/Refractory Acute Myeloid Leukemia or Myelodysplastic Syndrome
Source: Research Square preprint supplement (doi:10.21203/rs.3.rs-4889008/v1), 2024-10-14
Supplement: Supplementary file 3 [file 857ef9fec8021b2f6c68106d.pdf]

| Table 2 : Baseline Characteristics                                       |                           |
|--------------------------------------------------------------------------|---------------------------|
| Category                                                                 | Treated Patients<br>n (%) |
| Age [Year, Mean (SD)]                                                    | 63.7 (12.1)               |
| Gender                                                                   |                           |
| Female                                                                   | 12 (66.7%)                |
| Male                                                                     | 6 (33.3%)                 |
| Performance Status (ECOG)                                                |                           |
| 0                                                                        | 4 (22%)                   |
| 1                                                                        | 14 (78%)                  |
| Race                                                                     |                           |
| Black of African American                                                | 6 (33%)                   |
| White                                                                    | 10 (55.6%)                |
| Unknown                                                                  | 2 (11%)                   |
| Ethnicity                                                                |                           |
| Hispanic or Latino                                                       | 2 (11.1%)                 |
| Not Hispanic or Latino                                                   | 15 (83.3%)                |
| Unknown                                                                  | 1 (5.6%)                  |
| Disease Histology                                                        |                           |
| Acute Myeloid Leukemia                                                   | 16 (89%)                  |
| Myelodysplastic Syndrome                                                 | 2 (11%)                   |
| * The denominator for the percentage is 18 (number of treated patients). |                           |
